# Supplementary material
Source: Springer Nature journal article supplement (https://www.springermedizin.de/resource/supplementary/12958_2009_543_MOESM2_ESM.pdf/9568268)

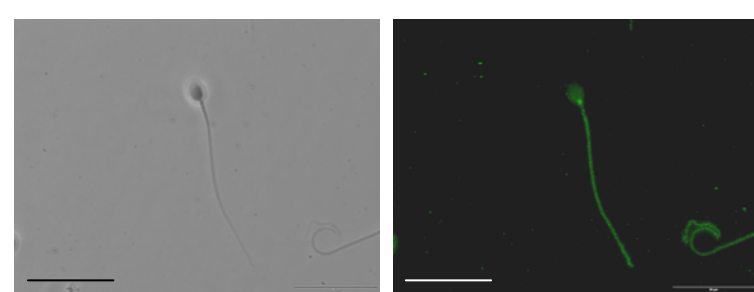

Na<sub>v</sub>1.2

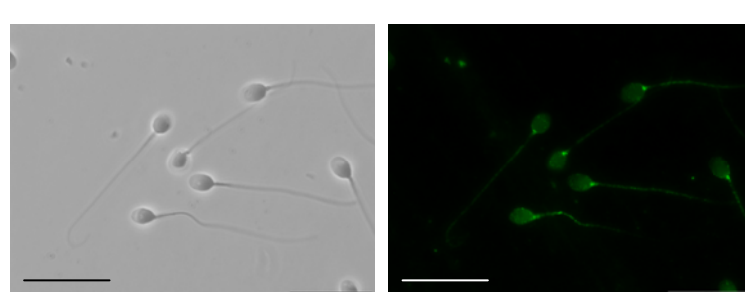

Na<sub>v</sub>1.7

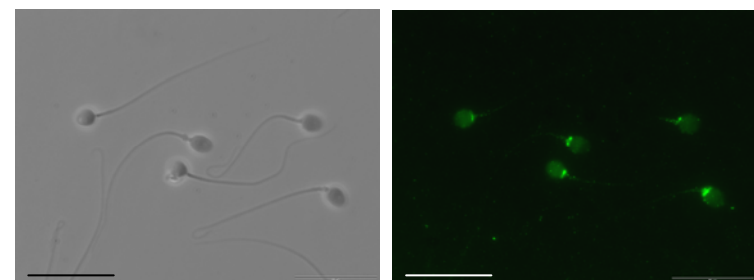

Na<sub>v</sub>1.4

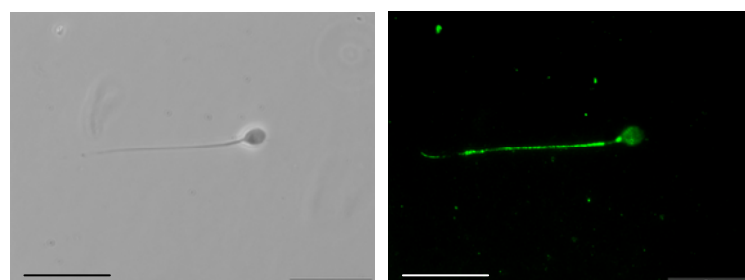

Na<sub>v</sub>1.8

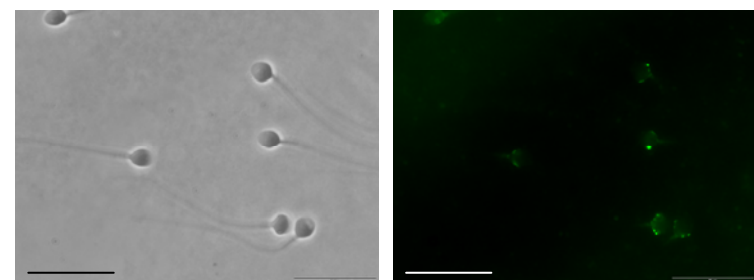

Na<sub>v</sub>1.5

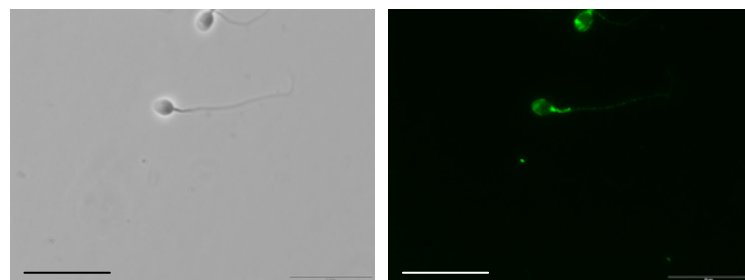

Na<sub>v</sub>1.9

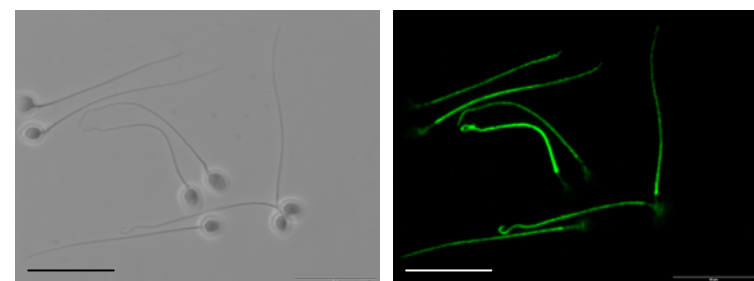

Na<sub>v</sub>1.6

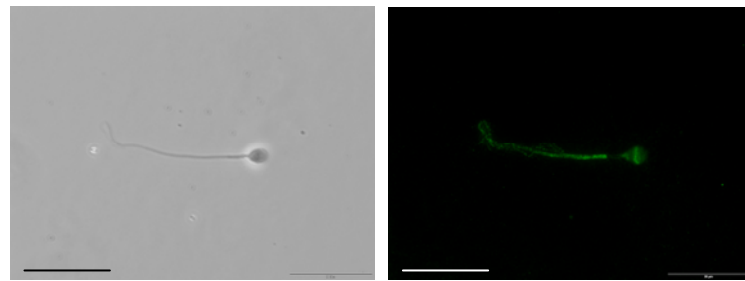

Na<sub>x</sub>

Supplement: MOESM2 [file 9568268]
